# Supplementary material
Source: PubMed Central journal article supplement (PMC3734428)
Supplement: 11999_2013_2834_MOESM2_ESM.pdf [file 11999_2013_2834_MOESM2_ESM.pdf]

# Questionnaire: Treatment of Unstable Intertrochanteric Femur Fractures

## \* 1. Identification of hospital:

## 2. Demographic data of the respondents:

|                                                |                      |
|------------------------------------------------|----------------------|
| Beds of hospital                               | <input type="text"/> |
| Department specialization                      | <input type="text"/> |
| beds at institution                            | <input type="text"/> |
| Hospital level (ACS Trauma Center Designation) | <input type="text"/> |

## \* 3. Intertrochanteric fractures treated at institutions per year (n):

- < 20
- 20-50
- 51-80
- 81-120
- > 120

## \* 4. When is surgery performed after patient admission in most cases?

- Directly, also at night
- After 6–12 hours
- After 12–24 hours
- Up to 48 hours
- Later

comment:

## \* 5. Fracture classification is performed according to

- No classification
- Broken lesser trochanter
- AO/OTA
- Evans
- Otherwise characterized (comment):

# Questionnaire: Treatment of Unstable Intertrochanteric Femur Fractures

## \*6. Instability criteria of intertrochanteric fracture (multiple-selection):

- Medial support
- Dislocated lesser trochanter
- Broken greater trochanter
- Broken lateral wall
- Always unstable (comment):

## \*7. Treatment of stable intertrochanteric fractures in your department? (multiple-selection):

- SHS
- SHS with ARS/TSP (antirotational screw/trochanteric stabilization plate)
- Gamma nail
- Gamma3 nail
- PFN
- PFNA
- Other implants (proportion intra-/extramedullary) (comment):

## \*8. Treatment of unstable intertrochanteric fractures in your department? (multiple-selection):

- SHS
- SHS with ARS/TSP (antirotational screw/trochanteric stabilization plate)
- Gamma nail
- Gamma3 nail
- PFN
- PFNA
- Other implants (proportion intra-/extramedullary) (comment):

# Questionnaire: Treatment of Unstable Intertrochanteric Femur Fractures

## \*9. How do you routinely manage unstable intertrochanteric fractures?

- with an extramedullary device
- with an intramedullary device
- regardless of which implant
- no idea

comment:

## \*10. Selection of implant in unstable fracture in most cases:

- Chief-based on preferences
- Consultant-based on preference
- Consultant-based on stability criteria
- Resident-based on stability criteria

comment:

## 11. Who is the surgeon in unstable fracture in most cases?

- Chief
- Consultant
- Resident alone
- Resident under supervision
- Unspecified
- Depends on fracture type (comment):

## \*12. Positioning of patient with unstable intertrochanteric fracture:

- Supine position without traction
- Traction table
- Other positions (comment):

## \*13. What is your estimation of surgical time (minutes)?

in stable intertrochanteric fracture

in unstable intertrochanteric fracture

# Questionnaire: Treatment of Unstable Intertrochanteric Femur Fractures

## \*14. What is your estimation of radiographic screening time (minutes)?

|                      | long (2-3 minutes)    | medium (1-2 minutes)  | short (<1 minute)     |
|----------------------|-----------------------|-----------------------|-----------------------|
| In stable fracture   | <input type="radio"/> | <input type="radio"/> | <input type="radio"/> |
| In unstable fracture | <input type="radio"/> | <input type="radio"/> | <input type="radio"/> |

## \*15. What is your estimation of blood cell package usage in first 24 hours (units)?

- No blood cell units
- 1 blood cell unit
- 2 blood cell units
- More than 2 blood cell units

comment:

## \*16. Mobilization and weight bearing after treatment of unstable intertrochanteric fracture:

- No weight bearing
- Partial weight bearing
- Full weight bearing
- According to instructions of the surgeon
- There is no clear scheme (comment):

## \*17. For how many days do the patients stay in hospital in unstable fracture?

- <5 days
- 5-8 days
- 9-11 days
- 12-14 days
- >14 days

comment:

# Questionnaire: Treatment of Unstable Intertrochanteric Femur Fractures

## \*18. What is your favourite discharge procedure in unstable intertrochanteric fracture?

- Home
- Rehabilitation hospital
- Geriatric hospital
- Transferring to another department
- No preference

comment:

## \*19. Most common complications in unstable intertrochanteric fracture (percentages and comment):

|                                        | 1%-10%                | 11%-20%               | 21%-30%               | 31%-40%               | 41%-50%               | 51%-60%               | 61%-70%               | 71-80%                | 81%-90%               | 91%-100%              |
|----------------------------------------|-----------------------|-----------------------|-----------------------|-----------------------|-----------------------|-----------------------|-----------------------|-----------------------|-----------------------|-----------------------|
| Cut-out                                | <input type="radio"/> |
| Fracture collapse with implant failure | <input type="radio"/> |
| Femoral neck shortening                | <input type="radio"/> |
| Trendelenburg sign / limping           | <input type="radio"/> |
| Leg length discrepancies               | <input type="radio"/> |
| Non-union                              | <input type="radio"/> |
| Hematomas                              | <input type="radio"/> |
| Infection                              | <input type="radio"/> |
| Other                                  | <input type="radio"/> |

comment:

## \*20. Do you agree about the benefit using cement augmentation techniques for hip fracture implants in osteoporosis?

- Yes
- No
- With limitations (comment):

## \*21. Do you agree about the benefit using minimally invasive extramedullary implants in unstable intertrochanteric fracture?

- Yes
- No
- With limitations (comment):

## Questionnaire: Treatment of Unstable Intertrochanteric Femur Fractures

### \*22. Clinical and radiological followup is performed ... after surgery:

- 1 week
- 2 weeks
- 4 weeks
- 8 weeks
- 12 weeks
- 6 months
- > 6 months
- No followup is performed

comment:

### \*23. What is your estimation of re-operation rate in unstable intertrochanteric fracture?

- <1 percent
- 1-3 percent
- 4-5 percent
- 6-10 percent
- 11-15 percent
- >15 percent

comment:

### \*24. Outcome-Scores (Harris-Hip, Merle d'Aubigné, Visual Analogue Scale)...

- I know, but make no sense
- I know, make sense
- I don't know

comment:

### \*25. The main problem in unstable intertrochanteric fracture treatment is?

### \*26. I'm willing to participate in multicenter studies...

- Yes
- No

comment:
